# Supplementary material
Source: PubMed Central journal article supplement (PMC5142110)
Supplement: mmc2.pdf [file mmc2.pdf]

# Epileptic Encephalopathy Caused by Mutations in the Guanine Nucleotide Exchange Factor *DENND5A*

Chanshuai Han,<sup>1,9</sup> Reem Alkhatir,<sup>2,9</sup> Tawfiq Froukh,<sup>3,9</sup> Arakel G. Minassian,<sup>4</sup> Melissa Galati,<sup>1</sup> Rui Han Liu,<sup>1</sup> Maryam Fotouhi,<sup>1</sup> Julia Sommerfeld,<sup>5</sup> Ayman J. Alfrook,<sup>6</sup> Christian Marshall,<sup>4</sup> Susan Walker,<sup>4</sup> Peter Bauer,<sup>5</sup> Stephen W. Scherer,<sup>4,7</sup> Olaf Riess,<sup>5</sup> Rebecca Buchert,<sup>5,10</sup> Berge A. Minassian,<sup>8,10</sup> and Peter S. McPherson<sup>1,10,\*</sup>

Epileptic encephalopathies are a catastrophic group of epilepsies characterized by refractory seizures and cognitive arrest, often resulting from abnormal brain development. Here, we have identified an epileptic encephalopathy additionally featuring cerebral calcifications and coarse facial features caused by recessive loss-of-function mutations in *DENND5A*. *DENND5A* contains a DENN domain, an evolutionarily ancient enzymatic module conferring guanine nucleotide exchange factor (GEF) activity to multiple proteins serving as GEFs for Rabs, which are key regulators of membrane trafficking. *DENND5A* is detected predominantly in neuronal tissues, and its highest levels occur during development. Knockdown of *DENND5A* leads to striking alterations in neuronal development. Mechanistically, these changes appear to result from upregulation of neurotrophin receptors, leading to enhanced downstream signaling. Thus, we have identified a link between a DENN domain protein and neuronal development, dysfunction of which is responsible for a form of epileptic encephalopathy.

With a lifetime incidence of 3%, epilepsy is a common neurological disorder. Epileptic encephalopathies are a rare but devastating subform of epilepsies that often result from gross alterations in brain development.<sup>1</sup> Epileptic encephalopathy is frequently of unknown etiology, but newly identified genetic forms of the syndrome provide insight into disease mechanisms. A consanguineous family from Saudi Arabia (family 1) presented with two affected sisters with epileptic encephalopathy (Figures 1A, 1C, and 1D). The proband (individual II-6 in Figure 1) is 14 years old and had a normal term delivery after an uncomplicated pregnancy. In the first day of life, she was noticed to have facial twitching, multifocal limb jerking, and clonic seizures. Presently, she has global developmental delay and spastic tetraplegia and is non-verbal and dependent on support for all activities of daily living. She has multiple daily seizures, namely tonic, myoclonic, and generalized tonic-clonic. Her younger sister is similarly affected but has additional exaggerated startle and startle-induced seizures. Electroencephalographs (EEGs) in both individuals reveal slow background and frequent frontally dominant lateralized, bifrontal, or generalized spike-wave discharges interictally or in association with myoclonus (shown for individual II-7 in Figure 2A). Ictal activity consisted of rhythmic runs of the same, culminating in generalized convulsion (Figure 2A). Both sisters have microcephaly. At age 7 years, the occipitofrontal circumference (OFC) for individual II-7 was 40 cm, below the second percentile. That of II-6 at age 10 years was 54 cm, corresponding to

the 50<sup>th</sup> percentile, but it should be noted that this child had hydrocephalus in the neonatal period and has a large posterior fossa arachnoid cyst (Figures 1F and 2B). The OFCs of the parents were not obtained, but neither appeared microcephalic. Magnetic resonance imaging (MRI) revealed dysgenesis of the corpus callosum and ventriculomegaly (Figures 2B and 2C). Individual II-6 additionally demonstrates Dandy-Walker malformation, hypoplastic vermis, and diffuse hydrocephalus (Figure 2C). Computed tomography (CT) images revealed multiple small foci of calcification in the basal ganglia for both individuals (Figures 1F and 1G). Routine cerebrospinal fluid analysis on these individuals, including chemistry, was normal.

A second consanguineous family (family 2) from Jordan also presented with two affected sisters (Figures 1B and 1E) after uneventful pregnancies and deliveries. Both children developed seizures in the neonatal period. Individual II-4 was examined at age 7 years and was noted to have severe global developmental delay. She has generalized tonic-clonic seizures, speaks only a few words, and exhibits major anxiety and hyperactivity. Only interictal EEG was available and revealed slow background with bifrontal epileptiform discharges. Her growth parameters are in the low range, and she is microcephalic (OFC 41 cm < the 1<sup>st</sup> percentile), whereas the OFC of her father and unaffected sibling II-3 are 54 and 51 cm, respectively (around the 50<sup>th</sup> percentile). The mother's OFC was not measured, but she did not appear microcephalic. CT showed multiple small foci of calcification in the white matter along the

<sup>1</sup>Department of Neurology and Neurosurgery, Montreal Neurological Institute, McGill University, Montreal, QC H3A 2B4, Canada; <sup>2</sup>Johns Hopkins Aramco Healthcare, Dhahran 34465, Saudi Arabia; <sup>3</sup>Department of Biotechnology and Genetic Engineering, Faculty of Science, Philadelphia University, Amman 11118, Jordan; <sup>4</sup>Centre for Applied Genomics, Genetics, and Genome Biology, Hospital for Sick Children, Toronto, ON M5G 0A4, Canada; <sup>5</sup>Institute of Medical Genetics and Applied Genomics, Rare Disease Center, University of Tübingen, Tübingen 72076, Germany; <sup>6</sup>Private clinic, Amman 11118, Jordan; <sup>7</sup>Department of Molecular Genetics and McLaughlin Centre, University of Toronto, Toronto, ON M5G 0A4, Canada; <sup>8</sup>Program in Genetics and Genome Biology, Department of Pediatrics (Neurology), Hospital for Sick Children and University of Toronto, Toronto, ON M5G 0A4, Canada

<sup>9</sup>These authors contributed equally to this work

<sup>10</sup>These authors contributed equally to this work

\*Correspondence: [peter.mcpherson@mcgill.ca](mailto:peter.mcpherson@mcgill.ca)

<http://dx.doi.org/10.1016/j.ajhg.2016.10.006>

© 2016 American Society of Human Genetics.

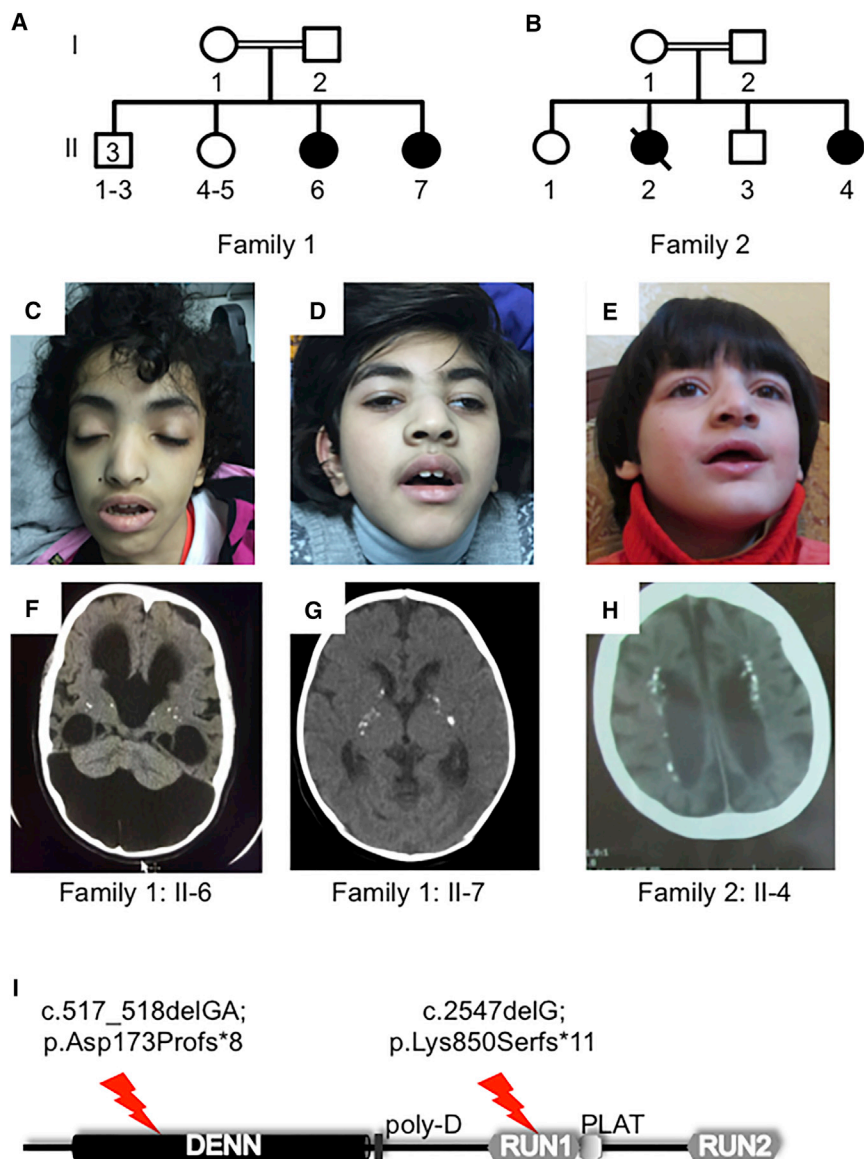

**Figure 1. Two Families Affected by Epileptic Encephalopathy Featuring Cerebral Calcification and Coarse Facial Features**

(A and B) Pedigrees of family 1 (A) and family 2 (B).

(C–E) Photographs of affected individuals II-6 (C) and II-7 (D) of family 1 and II-4 (E) of family 2. Note the common coarse facial features, including nasal prominence and frontal bossing.

(F–H) CT scans of the same individuals as above. Note the generalized atrophy and calcification (white spots) of the basal ganglia (F, II-6; G, II-7) and periventricular cortex (H).

(I) Schematic overview of the structure of DENND5A, which contains DENN, RUN, and PLAT domains. The positions of the identified truncating variants are indicated.

(research ethics board file no. 1000033784), Johns Hopkins Aramco Healthcare (institutional review board no. 42), the University of Tübingen (protocol no. 594/2015BO1), and Philadelphia University Jordan (protocol no. Feb 25,2015/1). Signed informed consent for collecting biological materials and publishing the results was obtained from legal guardians. All studies were performed in compliance with the Declaration of Helsinki.

To identify the genetic mutations responsible for the phenotypes, we performed whole-exome sequencing (WES) on individuals from both families 1 and 2. WES for the affected siblings of family 1 was performed on the Ion Proton system after exonic ampli-

fication with the Ion AmpliSeq Exome Kit (Life Technologies). Data analysis was performed with Ion Torrent Suite version 4.2.1.0. The resulting variant calls were annotated with a custom pipeline incorporating ANNOVAR.<sup>2</sup> For individuals II-6 and II-7 in family 1, the average read depth was 82 $\times$  and 130 $\times$ , respectively, and more than 88% and 93% of target bases, respectively, were covered at >20 $\times$ . A total of 53,996 (individual II-6) and 56,008 (individual II-7) variants (prior to application of any quality filtering) were detected. WES for individual II-4 of family 2 was performed on a NextSeq 500 platform (Illumina) after enrichment with SureSelectXT Human All Exon V5 (Agilent). Data analysis was performed through an in-house pipeline including BWA-MEM<sup>3</sup> for alignment. Variant calling utilized freebayes.<sup>4</sup> Variant annotation was performed with SnpEff, a program for annotating and predicting the effects of SNPs.<sup>5</sup> We achieved an average read depth of 131.1 $\times$ , and 86% of the target region was covered at least

lateral ventricles (Figure 1H). MRI scans were not performed. Individual II-2 of family 2 died at age 10 years and was not clinically assessed, but her parents reported that she had the same symptoms as her sister. All four affected individuals have (or had) similar coarse facial features (Figures 1C–1E). Specifically, they present with an open mouth with a slightly tented full upper lip and thick everted lower lip, short philtrum, and large nostrils of a prominent nose. They also have thick curved eyebrows, long eyelashes, and large ears (Figures 1C–1E). Individual II-4 of family 2 was also noted to have a high palate. In summary, the affected individuals have a severe neonatal-onset neurological disorder including severe epilepsy. To what extent the latter influences their neurodevelopment is unclear. The syndrome also appears to be characterized by relatively uniform facial features.

This project was approved by the ethics committees of the Hospital for Sick Children and University of Toronto

lateral ventricles (Figure 1H). MRI scans were not performed. Individual II-2 of family 2 died at age 10 years and was not clinically assessed, but her parents reported that she had the same symptoms as her sister. All four affected individuals have (or had) similar coarse facial features (Figures 1C–1E). Specifically, they present with an open mouth with a slightly tented full upper lip and thick everted lower lip, short philtrum, and large nostrils of a prominent nose. They also have thick curved eyebrows, long eyelashes, and large ears (Figures 1C–1E). Individual II-4 of family 2 was also noted to have a high palate. In summary, the affected individuals have a severe neonatal-onset neurological disorder including severe epilepsy. To what extent the latter influences their neurodevelopment is unclear. The syndrome also appears to be characterized by relatively uniform facial features.

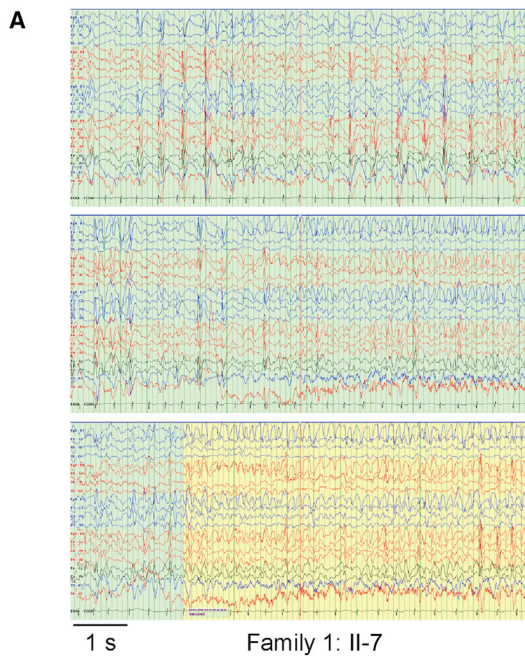

**Figure 2. EEG and MRI Analysis of Individuals from Family 1**

(A) Wakeful EEG of individual II-7 from family 1. Interictal activity (green background) is characterized by near-continuous independent or synchronous bilateral or generalized bifrontally dominant spike-wave discharges. Ictus (seizure; yellow background) is associated with continuous generalized bifrontally dominant rhythmic activity.

(B and C) MRI demonstrating dysgenesis of the corpus callosum (arrows) and ventriculomegaly in affected individuals II-6 (B) and II-7 (C), as well as Dandy-Walker malformation, a posterior fossa cyst, hypoplastic vermis, and diffuse hydrocephalus in individual II-6.

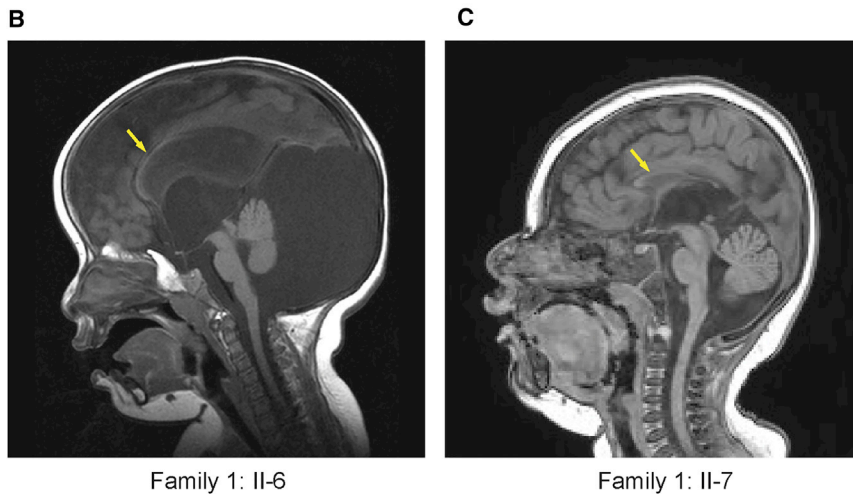

20 $\times$ . A total of 50,785 variants were identified with this approach.

To identify potentially pathogenic variants in both families, data analysis focused on rare variants (minor allele frequency of <1%) with a likely effect on protein function (e.g., nonsense, frameshift, splice-site, and missense variants) in both public databases (1000 Genomes Project,<sup>6</sup> the Exome Aggregation Consortium [ExAC] Browser,<sup>7</sup> and the NHLBI GO Exome Sequencing Project Exome Variant Server) and our in-house databases. Because the pattern of inheritance was expected to be autosomal recessive as a result of consanguinity in the parents, homozygous variants were assessed first. In family 1, the parents are second cousins (a coefficient of relationship of at least 3.13%). In family 2, the parents are first cousins (a coefficient of relationship of at least 12.5%). Exome data indicated a level of homozygosity of approximately 6.5%

for family 1 and approximately 10% for family 2. We consider these results to be reasonable given that these families are likely to have had many more consanguineous marriages, probably for many generations. In family 1, we found that the two affected siblings share ten high-quality homozygous variants, one of which is a c.517\_518delGA (p.Asp173Profs\*8) mutation leading to a frameshift in *DENND5A* (GenBank: NM\_015213.3) (Figure 1I). From the exome data, the homozygous regions spanning the variant in individuals II-6 and II-7 are approximately chr11: 8,014,479–19,901,632 and chr11: 8,959,545–19,256,250, respectively. In family 2, we identified a homozygous c.2547delG (p.Lys850Serfs\*11) mutation leading to a frameshift in *DENND5A* (Figure 1I), and the homozygous region is at least chr11:

7,110,751–2,063,940. Neither of these variants had been previously reported in public databases, and both were absent from the ExAC Browser. *DENND5A* is very conserved in the general population and is highly intolerant of loss-of-function variants. The pLI score is 0.99,<sup>7</sup> and no loss-of-function variant was found to be homozygous in the ExAC Browser. We screened retrospectively for all rare variants in previously reported genetic neurological disorders, including intellectual disability and epileptic encephalopathy, and no other potentially pathogenic variants were detected in either family.

The *DENND5A* variants were confirmed by Sanger sequencing, heterozygous in the parents, and absent or heterozygous in unaffected siblings (Figure S1). By virtue of the affected exons, both mutations are expected to lead to nonsense-mediated mRNA decay. *DENND5A* (also called Rab6-interacting protein 1) is composed of an

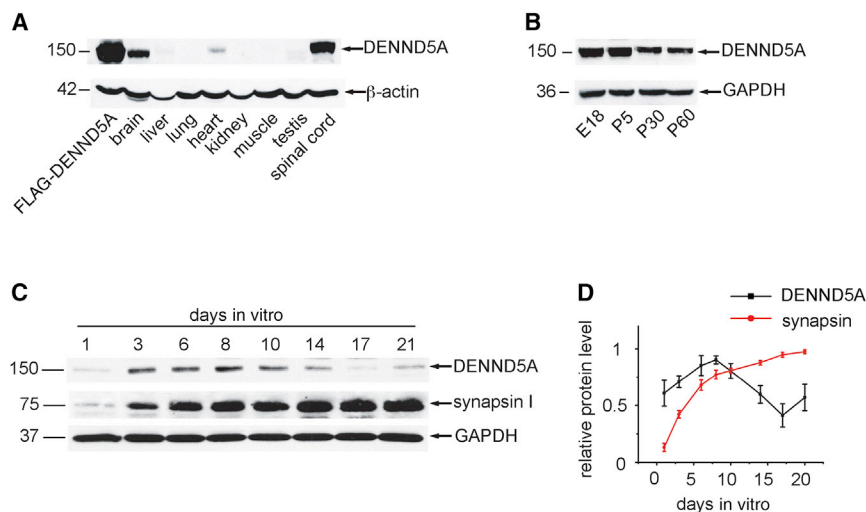

**Figure 3. DENND5A Is Detected Predominantly in Developing Neurons**

(A) Equal protein aliquots of lysates from various tissues were blotted with antibodies recognizing DENND5A (polyclonal antibody, Abcam) and actin (monoclonal antibody C4, Millipore) as indicated. Lysates from HEK293T cells expressing FLAG-tagged DENND5A (FLAG-DENND5A) were included as a control.

(B) Crude lysates were prepared from brains dissected from embryonic day 18 (E18) or postnatal day 5, 30, or 60 (P5, P30, or P60) rats. Equal protein aliquots were processed for western blot with antibodies recognizing DENND5A and GAPDH (monoclonal antibody, Santa Cruz) as indicated.

(C) Primary rat cortical neurons were seeded in culture dishes, and lysates were prepared from the neurons at the indicated

days in vitro. Equal protein aliquots were processed for western blots with antibodies recognizing DENND5A, GAPDH, and synapsin.<sup>19</sup> (D) Quantification of the relative amounts of DENND5A and synapsin from blots as in (C). The highest-intensity values were set as 1.0. Data represent the mean  $\pm$  SEM from eight independent experiments.

N-terminal DENN (differentially expressed in normal and neoplastic cells) domain followed by two RUN (RPIP8 [Rap2-interacting protein 8], UNC-14, and NESCA [new molecule containing SH3 at the carboxyl terminus]) domains flanking a PLAT (polycystin-1, lipoxygenase, alpha-toxin) domain (Figure 1I). In the rare case that no nonsense-mediated mRNA decay should occur, affected individuals in family 1 would have a truncated DENN domain that would almost certainly lead to misfolding of this module, and individual II-4 of family 2 would have a truncated N-terminal RUN domain (RUN1) with a similar consequence (Figure 1I). It is highly likely that either situation would lead to clearance of the misfolded protein. Thus, loss-of-function mutations in *DENND5A* cause a form of epileptic encephalopathy. We therefore sought to examine the role of DENND5A in neuronal development.

Through RUN1, DENND5A binds Rab6, a protein that regulates membrane trafficking and localizes to the trans-Golgi network (TGN).<sup>8,9</sup> Through this interaction, Rab6 targets DENND5A to the TGN.<sup>9</sup> Through the C-terminal RUN domain (RUN2), DENND5A interacts with sorting nexin 1, a component of endosome-derived vesicles that target to the TGN, and thus DENND5A is thought to function in the trafficking of cargo from endosomes to the TGN.<sup>10,11</sup> The DENN domain is an evolutionarily conserved module that functions globally as a GEF for Rabs,<sup>12–15</sup> which are critical regulators of intracellular membrane trafficking,<sup>16</sup> and DENND5A has been reported to function as a GEF for Rab39.<sup>14</sup> Two distinct gene products encode highly related isoforms of Rab39: Rab39A, which is associated with late endosomes and lysosomes,<sup>17</sup> and Rab39B, which is concentrated at the Golgi complex, where it regulates trafficking to synaptic terminals.<sup>18</sup> Thus, DENND5A functions in membrane trafficking at a crossroads between the Golgi and the

endosomal system, but the physiological outputs of DENND5A function remain unknown.

The observation that loss-of-function mutations in DENND5A cause epileptic encephalopathy suggests that DENND5A controls membrane trafficking pathways critical for normal neuronal development. We thus sought to examine the potential function of DENND5A in this process. Importantly, western blot detected DENND5A predominantly in neuronal tissues (Figure 3A), and in a panel of cell lines, it was detectable only in PC12 cells, a neuronal-like line (Figure S2A). However, we cannot rule out that more sensitive tests such as RT-PCR could detect low levels of expression in non-neuronal lines and tissues. Knockdown of DENND5A in PC12 cells confirmed that the protein band detected by the antibody is endogenous DENND5A (Figures S2B and S2C). In rat brain, DENND5A was at its highest levels at embryonic day 18 and continually decreased through to postnatal day 60 (Figure 3B). In rat cortical neurons in culture, the amount of DENND5A increased from 1 day in vitro (DIV) through to 8 DIV and then gradually declined up to 21 DIV (Figures 3C and 3D). In contrast, synapsin, a marker of mature synapses, increased throughout culture development (Figures 3C and 3D).<sup>19</sup> Thus, DENND5A is present predominantly in developing neuronal tissue.

We next sought to examine whether loss of function of DENND5A influences neuronal development. For these experiments, we chose hippocampal cultures, a well-characterized system for examining neuronal development.<sup>20</sup> The cultures were transduced with two distinct lentiviruses encoding shRNAmiRs targeting DENND5A. The shRNAmiR system involves small hairpin RNAs (shRNAs) that are expressed in the structural context of a microRNA<sup>21</sup> and was adapted by our laboratory as previously described.<sup>13</sup> Targeting DENND5A led to enhanced outgrowth of dendrites at 6 DIV, as marked by MAP2, in comparison to

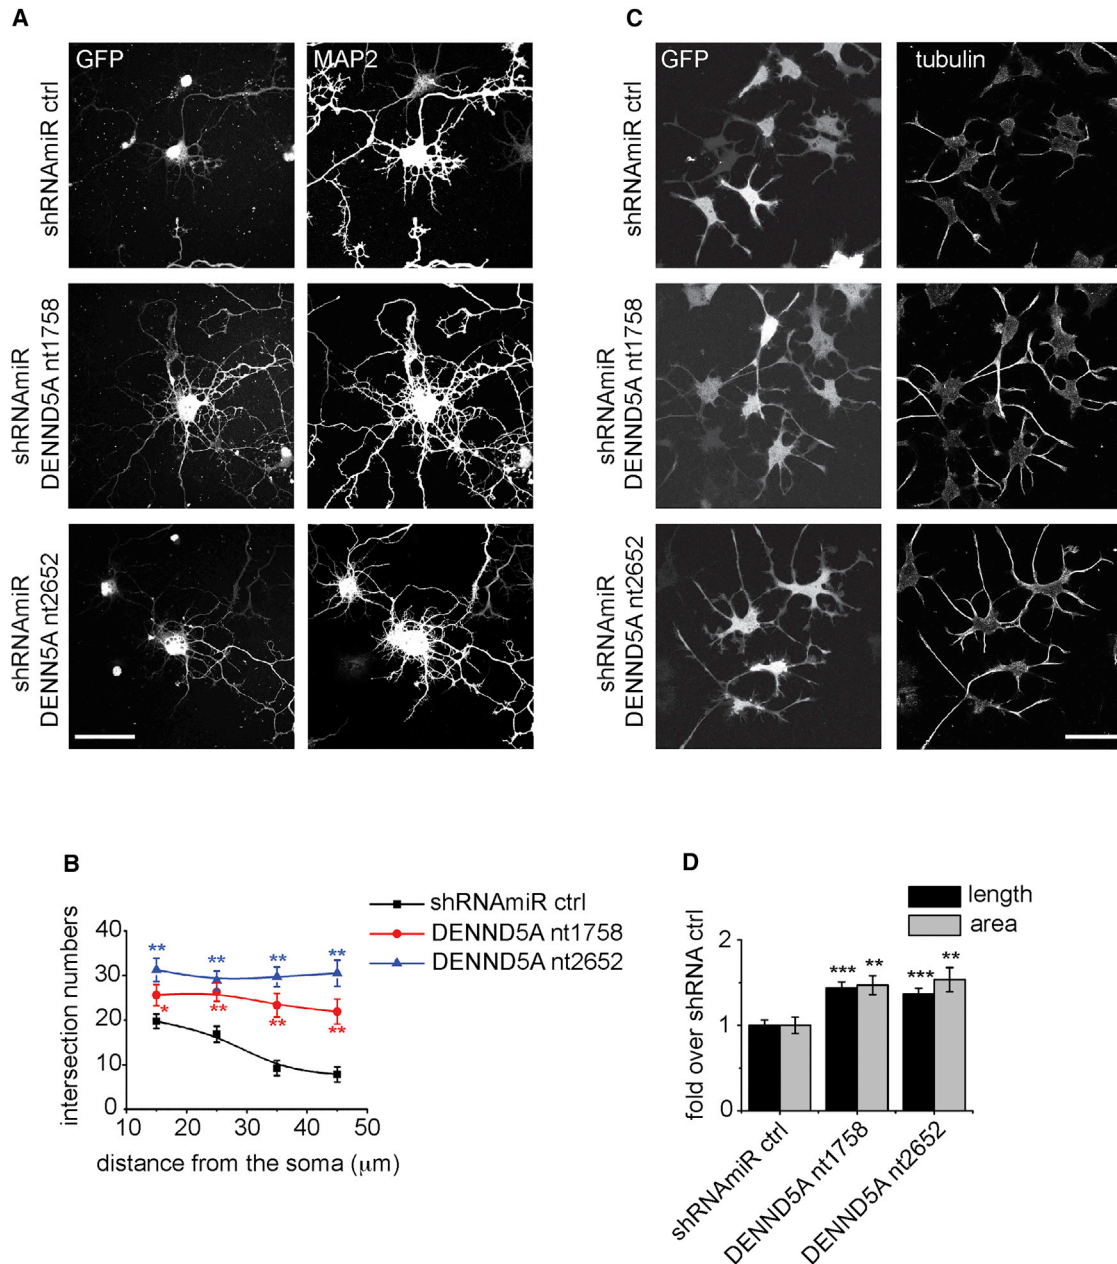

**Figure 4. DENND5A Knockdown Enhances Process Outgrowth in Neurons and PC12 Cells**

(A) Primary cultured hippocampal neurons at 1 day in vitro (DIV)<sup>22</sup> were transduced with lentivirus expressing shRNAmiRs targeting rat DENND5A mRNA (GenBank: NM\_001107546.2). The 21 nt inhibitory sequences match DENND5A starting at nucleotide 1,758 (shRNAmiR DENND5A nt1758: 5'-ACTCAGGATTTACCAGCTAAA-3') and nucleotide 2,652 (shRNAmiR DENND5A nt2652: 5'-GAGC CACGGGTACAAGTAAA-3'). Non-targeting shRNAmiR virus was used as a control (shRNAmiR ctrl).<sup>23</sup> At 6 DIV, transduced neurons were fixed and processed for GFP fluorescence and for indirect immunofluorescence with antibody recognizing MAP2 (chicken polyclonal antibody, EnCor Biotechnology) to reveal the somatodendritic region of the neurons. GFP was expressed as part of the viral expression cassette to verify transduction. Images were captured on a laser-scanning confocal microscope (LSM 710, Carl Zeiss) equipped with a Plan Apochromat 40× oil objective (numerical aperture 1.3; Carl Zeiss). Acquisition was performed with ZEN 11.0 software. The scale bar represents 50 μm.

(B) Sholl analysis for dendritic complexity of transduced hippocampal neurons from representative images as in (A) was performed with ImageJ with the ShollAnalysis plugin. Data represent the mean ± SEM from two independent experiments measuring a minimum of 18 neurons per condition per experiment; repeated-measure one-way ANOVA followed by a Dunnett's post-test revealed a significant difference between control and knockdown neurons. \**p* < 0.05, \*\**p* < 0.01.

(C) PC12 cells were transduced with control lentivirus (shRNAmiR ctrl) or lentivirus to knockdown rat DENND5A (shRNAmiR DENND5A nt1758 and shRNAmiR DENND5A nt2652). Transduced PC12 cells were serum starved for 24 hr and then treated with 50 ng/mL NGF (2.5S NGF, Cederlane) in serum-free medium. After 24 hr treatment, cells were fixed and processed for GFP fluorescence and for indirect immunofluorescence with antibody against α-tubulin (polyclonal antibody, ICN Biomedicals). GFP was expressed as part of the viral expression cassette to verify transduction. The scale bar represents 50 μm.

(legend continued on next page)

transduction with a lentivirus encoding a control shRNA-miR (Figure 4A). To quantify these differences, we performed a Sholl analysis, which involves drawing concentric rings around neurons and counting the number of times that a dendrite intersects a ring at each distance from the middle. At all distances from the soma, the knockdown cells had more intersections, indicating that they have longer dendrites with greater branching complexity (Figure 4B).

DENND5A is readily detectable in PC12 cells (Figure S2A). PC12 cells have been extensively used as a model system for neuronal development because neurite outgrowth can be initiated at defined times by the addition of nerve growth factor (NGF), and the signaling pathways controlling this process are well defined.<sup>24</sup> Knockdown of DENND5A in PC12 cells (Figures S2B and S2C) significantly enhanced NGF-induced differentiation at 24 hr, as indicated by both increased neurite length and increased total surface area of the cells (Figures 4C and 4D). Knockdown of DENND5A also led to a significant increase in PC12 cell differentiation, even in the absence of NGF treatment (Figures S3A and S3B). Thus, it appears that DENND5A plays an inhibitory role in dendrite outgrowth.

During nervous system development, multiple factors, including neurotrophins and activity, drive the development of dendrites and dendritic arborization. Often, these activities are balanced in a “push-pull” fashion.<sup>25</sup> For example, neurotrophins can both enhance and limit dendritic growth.<sup>25</sup> Disruption of either class of signal leads to improper synaptic connectivity. Naturally occurring cell death is a normal aspect of neuronal development,<sup>26</sup> and appropriate synaptic connectivity limits cell death by providing trophic factors and coordinated electrical activity.<sup>27</sup> Thus, although nervous system development is vastly complex and difficult to model in culture systems, it is reasonable to consider that disruption of DENND5A during neuronal development in affected individuals could lead to improper synaptic connectivity and result in enhanced neuronal death contributing to epilepsy.

We next sought to explore the mechanisms by which DENND5A contributes to neurite and dendrite development. In PC12 cells, NGF stimulates neurite outgrowth by binding to its receptor, TrkA, leading to sustained activation of Erk.<sup>24</sup> We thus tested for possible changes in Erk activation after knockdown of DENND5A. As expected, treating PC12 cells with NGF for 24 hr led to sustained Erk activation under control conditions (compare lanes 1 and 4 in the phospho-Erk1/2 blot in Figure 5A). Knockdown of DENND5A strongly potentiated NGF-induced Erk activation (Figures 5A and 5B). Erk potentiation following knockdown of DENND5A was seen even in the absence of NGF stimulation (Figures 5A and 5B). This is consistent with the observation that knockdown of DENND5A also

stimulated neurite outgrowth in the absence of NGF (Figure S3). Thus, loss of DENND5A function leads to overactivation of Erk, and this most likely contributes to disruptions in normal neuronal development.

Given that Erk is activated downstream of TrkA in PC12 cells,<sup>24</sup> we sought to examine whether there were alterations in the levels of TrkA after DENND5A knockdown. Knockdown of DENND5A led to upregulation of TrkA (Figures 5C and 5D). In contrast to PC12 cells, primary cortical and hippocampal neurons express TrkB, a neurotrophin receptor related to TrkA, and the development of these neurons is strongly influenced by brain-derived neurotrophic factor (BDNF), the ligand for TrkB.<sup>24</sup> Knockdown of DENND5A led to upregulation of TrkB in cultured cortical neurons (Figures 5E and 5F). Thus, an increase in the levels of Trk receptors could drive enhanced Erk activation, leading to the altered neurite outgrowth phenotypes observed.

The mechanisms whereby loss of DENND5A leads to enhanced amounts of neurotrophin receptor remain unknown. DENND5A functions as a GEF for Rab39,<sup>14</sup> and disruption of both Rab39A and Rab39B causes alterations in neuronal development.<sup>17,18</sup> DENND5A functions at an interface between endosomes and the TGN, as does Rab39. Alterations in these pathways could lead to enhanced stability of neurotrophin receptors by preventing their targeting to lysosomes for degradation. At least in neuroblastoma cells, activation of TrkA in the absence of NGF, which occurs upon TrkA overexpression, has been shown to lead to apoptosis.<sup>28</sup> Hence, upregulation of Trk receptors due to DENND5A deficiency could lead to increased apoptosis in the developing brain. Mutations in *NTRK1* (MIM: 256800; encoding TrkA) and *NTRK2* (MIM: 613886; encoding TrkB) have been reported in individuals with intellectual disability.<sup>29,30</sup>

The severe alterations in neuronal development in the affected individuals described here most likely result from multiple factors. For example, all affected individuals have brain calcifications. Three prior established genetic causes of brain calcifications are mutations in *PDGFRB* (MIM: 615007), *PDGFB* (MIM: 615483), and *SLC20A2* (MIM: 213600), the latter of which are by far the most common.<sup>31</sup> *SLC20A2* is a phosphate transporter, and *PDGFRB* and *PDGFB* have been implicated in modulating levels of *SLC20A1*, another phosphate transporter.<sup>32</sup> Alterations in the levels or localization of these transporters after DENND5A loss of function could contribute to the calcification facet of the pathology seen in the individuals included in this study.

Recently, mutations in *DNM1* (MIM: 602377), encoding the GTPase dynamin, which functions in the scission of clathrin-coated vesicles, were found to cause epileptic encephalopathy.<sup>33,34</sup> Truncating alterations in the GEF

---

(D) Length of the longest neurite (length) and total area of neurites (area) for each cell from representative images as in (C) were analyzed with ImageJ. Data show the mean  $\pm$  SEM from two independent experiments measuring a minimum of 30 cells per condition per experiment; repeated-measure one-way ANOVA followed by a Dunnett's post-test revealed a significant difference between control and knockdown cells. \*\*p < 0.01, \*\*\*p < 0.001.

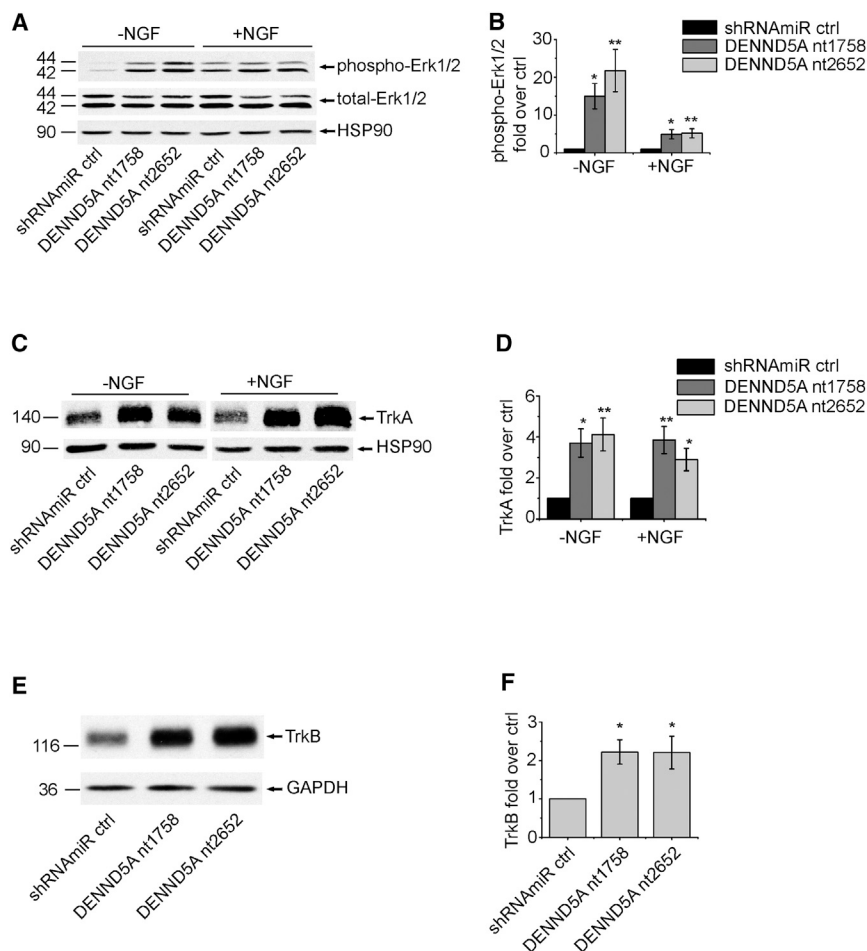

**Figure 5. Knockdown of DENND5A Leads to Enhanced Erk Activation and Increased Amounts of Neurotrophin Receptors**

(A) PC12 cells were transduced with control lentivirus (shRNAmiR ctrl) or lentivirus to knockdown DENND5A (DENND5A nt1758 and DENND5A nt2652). After 24 hr serum starvation, transduced PC12 cells were harvested (–NGF) or treated for an additional 24 hr with NGF (50 ng/mL) (+NGF). Equal protein aliquots of lysates prepared from these cells were processed by western blot with antibodies recognizing phospho-Erk (monoclonal antibody, Cell Signaling Technology) and total Erk (monoclonal antibody, Cell Signaling Technology). HSP90 (monoclonal antibody, Assay Designs Stressgen) was used as a loading control.

(B) Quantification of five experiments performed as in (A). The graphs show the average relative change in phospho Erk1/2 levels normalized to total Erk1/2 levels between cells with knockdown DENND5A and control cells. Error bars represent the SEM, and statistical analysis employed a one-way ANOVA followed by a Bonferroni post-test. \* $p < 0.05$ , \*\* $p < 0.01$ .

(C) After 24 hr serum starvation, transduced PC12 cells were harvested (–NGF) or treated for 24 hr with NGF (50 ng/mL) (+NGF). Equal protein aliquots of lysates prepared from these cells were processed by western blot with antibodies recognizing TrkA (polyclonal antibody for pan Trk [TrkA and TrkB] [C17F1], Cell Signaling Technology) and HSP90.

(D) Quantification of TrkA amounts from experiments as in (C) normalized to

HSP90 and expressed in relation to those in control shRNAmiR cells. Data show the mean  $\pm$  SEM from eight independent experiments, and statistical analysis employed a one-way ANOVA followed by a Bonferroni post-test. \* $p < 0.05$ , \*\* $p < 0.01$ .

(E) Rat cortical neurons were transduced with control lentivirus (shRNAmiR ctrl) or lentivirus to knockdown DENND5A (DENND5A nt1758 and DENND5A nt2652) at 1 DIV. Cell lysates were prepared at 8 DIV, and equal protein aliquots were processed by western blot with antibodies recognizing the indicated proteins.

(F) Quantification of TrkB levels from experiments as in (E) normalized to GAPDH and expressed in relation to those of control shRNAmiR cells. Data show the mean  $\pm$  SEM from six independent experiments, and statistical analysis employed a repeated-measure one-way ANOVA followed by a Dunnett's post-test. \* $p < 0.05$ .

for ARF6, encoded by *IQSEC2* (MIM: 309530), have been reported in individuals with X-linked intellectual disability with epilepsy and microcephaly.<sup>35</sup> ARF6 functions in endosomal membrane trafficking. Many other factors playing a role in vesicular trafficking, e.g., *RAB3GAP1* (MIM: 600118),<sup>36</sup> *RAB3GAP2* (MIM: 614225),<sup>37</sup> and members of the adaptor protein complexes,<sup>38–41</sup> have been reported in various forms of syndromic and non-syndromic intellectual disability, as well as related disorders. Perhaps of most relevance, mutations in *RAB39B* (MIM: 300271) cause intellectual disability with epilepsy.<sup>18</sup> All together, this evidence appears to indicate that alterations in membrane trafficking are emerging as a central locus in intellectual disability and epileptic encephalopathy, and our study further supports this concept.

While our paper was in review, another two consanguineous families, each with one child affected by biallelic trun-

cating or highly damaging *DENND5A* mutations, were reported.<sup>42</sup> These children are young (21 and 26 months old), but their phenotypes to date are highly similar to those of the individuals described here. These four families together establish this genetic disease and will allow specific diagnosis and genetic counselling in affected families.

### Supplemental Data

Supplemental Data include three figures and can be found with this article online at <http://dx.doi.org/10.1016/j.ajhg.2016.10.006>.

### Acknowledgments

We thank Dr. Pietro De Camilli for the gift of the synapsin antibody and M. Wilke for help with the analysis of computed tomography scans. This study was supported by a grant from the

Canadian Institutes for Health Research (MOP-62684) to P.S.M., by a grant from the German Academic Exchange Service as part of the German-Arab Transformation Program Line4 (project ID 57166498) to O.R. and T.E., and by funding from the Ontario Brain Institute and Genome Canada to B.A.M. C.H. is supported by a fellowship from Fonds de Recherche du Québec – Santé (Dossier-30199 and Dossier-33963). B.A.M. holds the University of Toronto Michael Bahen Chair in Epilepsy Research. P.S.M. is a James McGill Professor and a Fellow of the Royal Society of Canada.

Received: July 11, 2016

Accepted: October 10, 2016

Published: November 17, 2016

## Web Resources

ExAC Browser, <http://exac.broadinstitute.org/>

NHLBI GO Exome Sequencing Project (ESP) Exome Variant Server, <http://evs.gs.washington.edu/EVS/>

OMIM, <http://www.omim.org>

RefSeq, <https://www.ncbi.nlm.nih.gov/refseq/>

## References

- Carvill, G.L., Heavin, S.B., Yendle, S.C., McMahon, J.M., O’Roak, B.J., Cook, J., Khan, A., Dorschner, M.O., Weaver, M., Calvert, S., et al. (2013). Targeted resequencing in epileptic encephalopathies identifies de novo mutations in CHD2 and SYNGAP1. *Nat. Genet.* *45*, 825–830.
- Wang, K., Li, M., and Hakonarson, H. (2010). ANNOVAR: functional annotation of genetic variants from high-throughput sequencing data. *Nucleic Acids Res.* *38*, e164.
- Li, H. (2013). Aligning sequence reads, clone sequences and assembly contigs with BWA-MEM. arXiv, arXiv:1303.3997v1 [q-bio.GN], <https://arxiv.org/abs/1303.3997>.
- Garrison, E., and Marth, G. (2012). Haplotype-based variant detection from short-read sequencing. arXiv, arXiv:1207.3907 [q-bio.GN], <https://arxiv.org/abs/1207.3907>.
- Cingolani, P., Platts, A., Wang, L., Coon, M., Nguyen, T., Wang, L., Land, S.J., Lu, X., and Ruden, D.M. (2012). A program for annotating and predicting the effects of single nucleotide polymorphisms, SnpEff: SNPs in the genome of *Drosophila melanogaster* strain w1118; iso-2; iso-3. *Fly (Austin)* *6*, 80–92.
- Abecasis, G.R., Auton, A., Brooks, L.D., DePristo, M.A., Durbin, R.M., Handsaker, R.E., Kang, H.M., Marth, G.T., McVean, G.A.; and 1000 Genomes Project Consortium (2012). An integrated map of genetic variation from 1,092 human genomes. *Nature* *491*, 56–65.
- Lek, M., Karczewski, K.J., Minikel, E.V., Samocha, K.E., Banks, E., Fennell, T., O’Donnell-Luria, A.H., Ware, J.S., Hill, A.J., Cummings, B.B., et al.; Exome Aggregation Consortium (2016). Analysis of protein-coding genetic variation in 60,706 humans. *Nature* *536*, 285–291.
- Goud, B., Zahraoui, A., Tavitian, A., and Saraste, J. (1990). Small GTP-binding protein associated with Golgi cisternae. *Nature* *345*, 553–556.
- Recacha, R., Boulet, A., Jollivet, F., Monier, S., Houdusse, A., Goud, B., and Khan, A.R. (2009). Structural basis for recruitment of Rab6-interacting protein 1 to Golgi via a RUN domain. *Structure* *17*, 21–30.
- Wassmer, T., Attar, N., Harterink, M., van Weering, J.R., Traer, C.J., Oakley, J., Goud, B., Stephens, D.J., Verkade, P., Korswagen, H.C., and Cullen, P.J. (2009). The retromer coat complex coordinates endosomal sorting and dynein-mediated transport, with carrier recognition by the trans-Golgi network. *Dev. Cell* *17*, 110–122.
- Fernandes, H., Franklin, E., Jollivet, F., Bliedtner, K., and Khan, A.R. (2012). Mapping the interactions between a RUN domain from DENND5/Rab6IP1 and sorting nexin 1. *PLoS ONE* *7*, e35637.
- Sato, M., Sato, K., Liou, W., Pant, S., Harada, A., and Grant, B.D. (2008). Regulation of endocytic recycling by *C. elegans* Rab35 and its regulator RME-4, a coated-pit protein. *EMBO J.* *27*, 1183–1196.
- Allaire, P.D., Marat, A.L., Dall’Armi, C., Di Paolo, G., McPherson, P.S., and Ritter, B. (2010). The Connecdenn DENN domain: a GEF for Rab35 mediating cargo-specific exit from early endosomes. *Mol. Cell* *37*, 370–382.
- Yoshimura, S., Gerondopoulos, A., Linford, A., Rigden, D.J., and Barr, F.A. (2010). Family-wide characterization of the DENN domain Rab GDP-GTP exchange factors. *J. Cell Biol.* *191*, 367–381.
- Marat, A.L., Dokainish, H., and McPherson, P.S. (2011). DENN domain proteins: regulators of Rab GTPases. *J. Biol. Chem.* *286*, 13791–13800.
- Zerial, M., and McBride, H. (2001). Rab proteins as membrane organizers. *Nat. Rev. Mol. Cell Biol.* *2*, 107–117.
- Mori, Y., Matsui, T., Omote, D., and Fukuda, M. (2013). Small GTPase Rab39A interacts with UACA and regulates the retinoic acid-induced neurite morphology of Neuro2A cells. *Biochem. Biophys. Res. Commun.* *435*, 113–119.
- Giannandrea, M., Bianchi, V., Mignogna, M.L., Sirri, A., Carrabino, S., D’Elia, E., Vecellio, M., Russo, S., Cogliati, F., Larizza, L., et al. (2010). Mutations in the small GTPase gene RAB39B are responsible for X-linked mental retardation associated with autism, epilepsy, and macrocephaly. *Am. J. Hum. Genet.* *86*, 185–195.
- De Camilli, P., Cameron, R., and Greengard, P. (1983). Synapsin I (protein I), a nerve terminal-specific phosphoprotein. I. Its general distribution in synapses of the central and peripheral nervous system demonstrated by immunofluorescence in frozen and plastic sections. *J. Cell Biol.* *96*, 1337–1354.
- Verderio, C., Coco, S., Pravettoni, E., Bacci, A., and Matteoli, M. (1999). Synaptogenesis in hippocampal cultures. *Cell. Mol. Life Sci.* *55*, 1448–1462.
- Stegmeier, F., Hu, G., Rickles, R.J., Hannon, G.J., and Elledge, S.J. (2005). A lentiviral microRNA-based system for single-copy polymerase II-regulated RNA interference in mammalian cells. *Proc. Natl. Acad. Sci. USA* *102*, 13212–13217.
- Burman, J.L., Wasiak, S., Ritter, B., de Heuvel, E., and McPherson, P.S. (2005). Aftiphilin is a component of the clathrin machinery in neurons. *FEBS Lett.* *579*, 2177–2184.
- Ritter, B., Murphy, S., Dokainish, H., Girard, M., Gudheti, M.V., Kozlov, G., Halin, M., Philie, J., Jorgensen, E.M., Gehring, K., and McPherson, P.S. (2013). NECAP 1 regulates AP-2 interactions to control vesicle size, number, and cargo during clathrin-mediated endocytosis. *PLoS Biol.* *11*, e1001670.
- Vaudry, D., Stork, P.J., Lazarovici, P., and Eiden, L.E. (2002). Signaling pathways for PC12 cell differentiation: making the right connections. *Science* *296*, 1648–1649.
- McAllister, A.K. (2000). Cellular and molecular mechanisms of dendrite growth. *Cereb. Cortex* *10*, 963–973.



26. Oppenheim, R.W. (1991). Cell death during development of the nervous system. *Annu. Rev. Neurosci.* *14*, 453–501.
27. Aminoff, M.J., and Daroff, R.B. (2014). Encyclopedia of the neurological sciences (Elsevier Academic Press).
28. Ruggeri, P., Cappabianca, L., Farina, A.R., Gneo, L., and Mackay, A.R. (2016). NGF FLIPs TrkA onto the death TRAIL in neuroblastoma cells. *Cell Death Dis.* *7*, e2139.
29. Indo, Y., Tsuruta, M., Hayashida, Y., Karim, M.A., Ohta, K., Kawano, T., Mitsubuchi, H., Tonoki, H., Awaya, Y., and Matsuda, I. (1996). Mutations in the TRKA/NGF receptor gene in patients with congenital insensitivity to pain with anhidrosis. *Nat. Genet.* *13*, 485–488.
30. Yeo, G.S.H., Connie Hung, C.C., Rochford, J., Keogh, J., Gray, J., Sivaramakrishnan, S., O'Rahilly, S., and Farooqi, I.S. (2004). A de novo mutation affecting human TrkB associated with severe obesity and developmental delay. *Nat. Neurosci.* *7*, 1187–1189.
31. Lemos, R.R., Ramos, E.M., Legati, A., Nicolas, G., Jenkinson, E.M., Livingston, J.H., Crow, Y.J., Champion, D., Coppola, G., and Oliveira, J.R. (2015). Update and Mutational Analysis of SLC20A2: A Major Cause of Primary Familial Brain Calcification. *Hum. Mutat.* *36*, 489–495.
32. Villa-Bellosta, R., Levi, M., and Sorribas, V. (2009). Vascular smooth muscle cell calcification and SLC20 inorganic phosphate transporters: effects of PDGF, TNF-alpha, and Pi. *Pflugers Arch.* *458*, 1151–1161.
33. Dhindsa, R.S., Bradrick, S.S., Yao, X., Heinzen, E.L., Petrovski, S., Krueger, B.J., Johnson, M.R., Frankel, W.N., Petrou, S., Boumil, R.M., and Goldstein, D.B. (2015). Epileptic encephalopathy-causing mutations in DNMI impair synaptic vesicle endocytosis. *Neurol. Genet.* *1*, e4.
34. EuroEPINOMICS-RES Consortium; Epilepsy Phenome/Genome Project; and Epi4K Consortium (2014). De novo mutations in synaptic transmission genes including DNMI cause epileptic encephalopathies. *Am. J. Hum. Genet.* *95*, 360–370.
35. Shoubridge, C., Tarpey, P.S., Abidi, F., Ramsden, S.L., Rujirabanjerd, S., Murphy, J.A., Boyle, J., Shaw, M., Gardner, A., Proos, A., et al. (2010). Mutations in the guanine nucleotide exchange factor gene IQSEC2 cause nonsyndromic intellectual disability. *Nat. Genet.* *42*, 486–488.
36. Aligianis, I.A., Johnson, C.A., Gissen, P., Chen, D., Hampshire, D., Hoffmann, K., Maina, E.N., Morgan, N.V., Tee, L., Morton, J., et al. (2005). Mutations of the catalytic subunit of RAB3GAP cause Warburg Micro syndrome. *Nat. Genet.* *37*, 221–223.
37. Aligianis, I.A., Morgan, N.V., Mione, M., Johnson, C.A., Rosser, E., Hennekam, R.C., Adams, G., Trembath, R.C., Pilz, D.T., Stoodley, N., et al. (2006). Mutation in Rab3 GTPase-activating protein (RAB3GAP) noncatalytic subunit in a kindred with Martsolf syndrome. *Am. J. Hum. Genet.* *78*, 702–707.
38. Montpetit, A., Côté, S., Brustein, E., Drouin, C.A., Lapointe, L., Boudreau, M., Meloche, C., Drouin, R., Hudson, T.J., Drapeau, P., and Cossette, P. (2008). Disruption of AP1S1, causing a novel neurocutaneous syndrome, perturbs development of the skin and spinal cord. *PLoS Genet.* *4*, e1000296.
39. Abou Jamra, R., Philippe, O., Raas-Rothschild, A., Eck, S.H., Graf, E., Buchert, R., Borck, G., Ekici, A., Brockschmidt, F.F., Nöthen, M.M., et al. (2011). Adaptor protein complex 4 deficiency causes severe autosomal-recessive intellectual disability, progressive spastic paraplegia, shy character, and short stature. *Am. J. Hum. Genet.* *88*, 788–795.
40. Moreno-De-Luca, A., Helmers, S.L., Mao, H., Burns, T.G., Melton, A.M., Schmidt, K.R., Fernhoff, P.M., Ledbetter, D.H., and Martin, C.L. (2011). Adaptor protein complex-4 (AP-4) deficiency causes a novel autosomal recessive cerebral palsy syndrome with microcephaly and intellectual disability. *J. Med. Genet.* *48*, 141–144.
41. Verkerk, A.J., Schot, R., Dumee, B., Schellekens, K., Swagemakers, S., Bertoli-Avella, A.M., Lequin, M.H., Dudink, J., Goovaert, P., van Zwol, A.L., et al. (2009). Mutation in the AP4M1 gene provides a model for neuroaxonal injury in cerebral palsy. *Am. J. Hum. Genet.* *85*, 40–52.
42. Anazi, S., Maddirevula, S., Faqeih, E., Alsedairy, H., Alzahrani, F., Shamseldin, H.E., Patel, N., Hashem, M., Ibrahim, N., Abdulwahab, F., et al. (2016). Clinical genomics expands the morbid genome of intellectual disability and offers a high diagnostic yield. *Mol. Psychiatry*. <http://dx.doi.org/10.1038/mp.2016.113>.

**The American Journal of Human Genetics, Volume 99**

**Supplemental Data**

**Epileptic Encephalopathy Caused by Mutations  
in the Guanine Nucleotide Exchange Factor *DENND5A***

**Chanshuai Han, Reem Alkhater, Tawfiq Froukh, Arakel G. Minassian, Melissa Galati, Rui Han Liu, Maryam Fotouhi, Julia Sommerfeld, Ayman J. Albrook, Christian Marshall, Susan Walker, Peter Bauer, Stephen W. Scherer, Olaf Riess, Rebecca Buchert, Berge A. Minassian, and Peter S. McPherson**

## Supplemental Figures

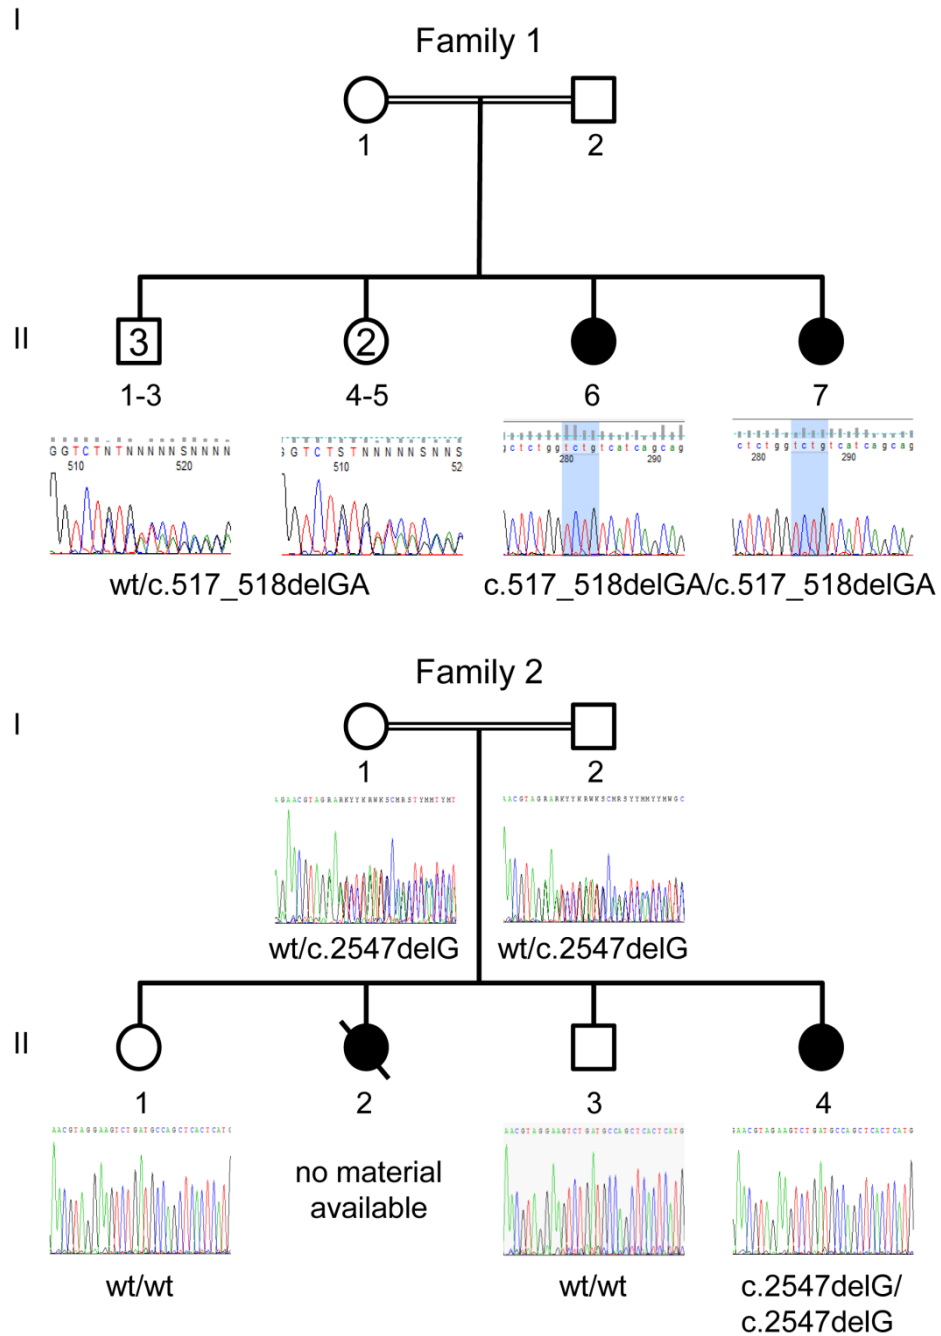

**Figure S1: Sanger sequence traces of affected and non-affected family members**

Sequence traces of affected and unaffected heterozygote siblings (Family 1) and heterozygote parents and wild-type siblings (Family 2).

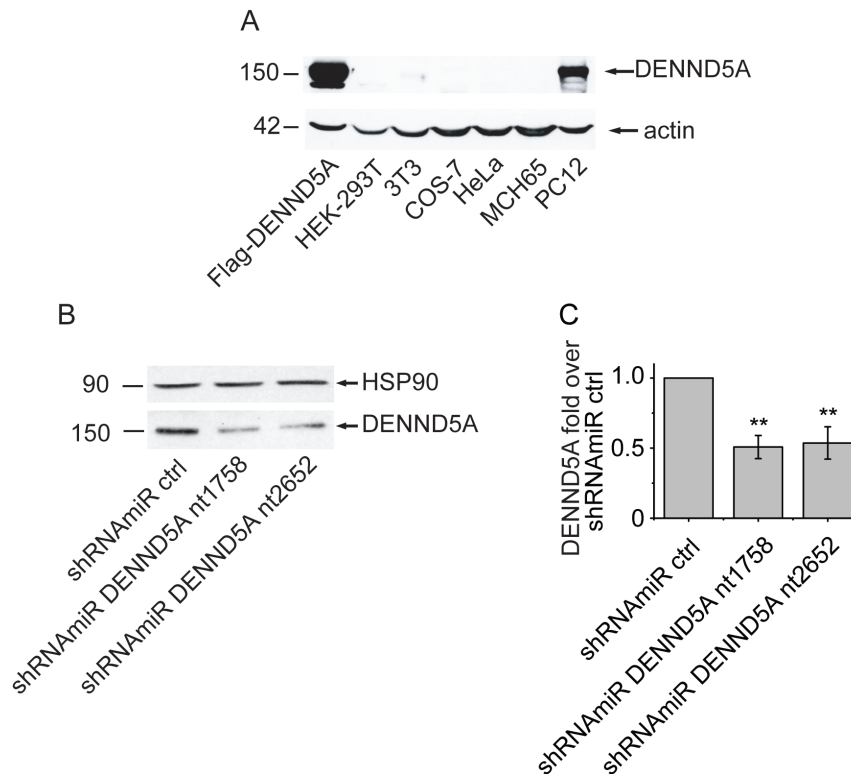

## Figure S2: Knockdown of DENND5A

(A) Equal protein aliquots of lysates from cell lines were blotted with antibodies recognizing DENND5A (polyclonal antibody, Abcam) and actin (monoclonal antibody C4, Millipore) as indicated. Lysates from HEK-293T expressing Flag-tagged DENND5A (Flag-DENND5A) were included as a control. (B) PC12 cells were transduced with control lentivirus (shRNAmiR ctrl) or lentivirus to knockdown DENND5A (shRNAmiR DENND5A nt1758, shRNAmiR DENND5A nt2652). Equal protein aliquots of lysates from transduced PC12 cells were processed by Western blot for DENND5A and HSP90. (C) Quantification of DENND5A levels from experiments as in B normalized to HSP90 and expressed relative to the shRNAmiR ctrl cells. Error bars represent s.e.m. and statistical analysis employed a repeated-measure one-way ANOVA followed by a Dunnett's post-test. \*\*,  $p < 0.01$ . N=5.

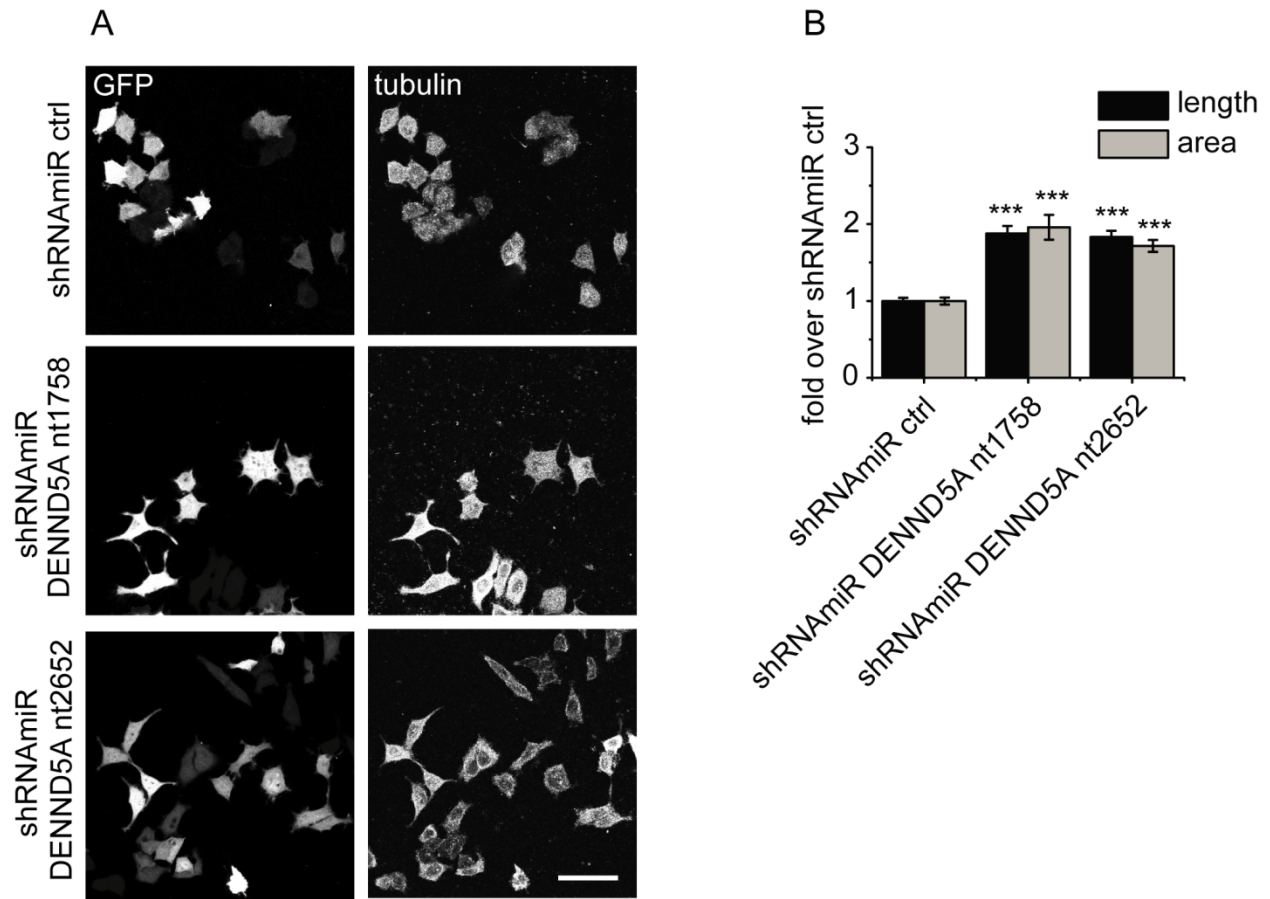

**Figure S3: Knockdown of DENND5A enhances neurite outgrowth in the absence of NGF**

(A) PC12 cells were transduced with control lentivirus (shRNAmiR ctrl) or lentivirus to knockdown DENND5A (shRNAmiR DENND5A nt1758, shRNAmiR DENND5A nt2652). Transduced PC12 cells were serum starved for 24 h, fixed and processed for GFP fluorescence and for indirect immunofluorescence with antibody against tubulin. GFP is expressed as part of the viral expression cassette to verify transduction. The bar represents 50  $\mu$ m. (B) Quantification of length of the longest neurite or protrusion (length) and total area of neurites (area) for each cell from representative images as in A. The data show the mean  $\pm$  s.e.m. from two independent experiments measuring 30 cells per condition per experiment; a repeated-measure one-way ANOVA followed by a Dunnett's post-test revealed a significant difference between control and DENND5A knockdown cells. \*\*\*,  $p < 0.001$ .
